# Supplementary material for: Abyssal deposit feeders are secondary consumers of detritus and rely on nutrition derived from microbial communities in their guts
Source: PubMed Central journal article supplement (PMC8206261; doi:10.1038/s41598-021-91927-4), 2021-06-15
Supplement: 41598_2021_91927_MOESM1_ESM.pdf [file 41598_2021_91927_MOESM1_ESM.pdf]

## Deposit feeders are secondary consumers of detritus in an abyssal food web

Sonia Romero-Romero, Elizabeth C. Miller, Jesse Black, Brian N. Popp, Jeffrey C. Drazen

### Supplementary Information

Table S1. Stable isotopic composition:  $\delta^{15}\text{N}$ ,  $\delta^{13}\text{C}$ , and  $\delta^{15}\text{N}_{\text{Src-AA}}$  values; elemental composition: total nitrogen (TN), contribution of total nitrogen from amino acids (N in AA); trophic position (TP); and degree of degradation:  $\Sigma V$ , DI, Mol% of Gly of individual samples used in the study. Mean  $\pm$  SD and values in parenthesis represent the propagated error for  $\delta^{15}\text{N}_{\text{Src-AA}}$  values and trophic position (TP) calculation.

| Sample ID        | Type     | Species             | Month | Weight (g) | $\delta^{15}\text{N}$ (‰) | $\delta^{13}\text{C}$ (‰) | TN (wt. %) | N in AA (wt. %)                               | $\delta^{15}\text{N}_{\text{Src-AA}}$ (‰) | TP        | $\Sigma V$ | DI     | Mol Gly (%) |
|------------------|----------|---------------------|-------|------------|---------------------------|---------------------------|------------|-----------------------------------------------|-------------------------------------------|-----------|------------|--------|-------------|
| AT4210_4_0-0.5   | Sediment |                     | May   |            | 9.7                       | -22.1                     | 0.23       | $8.26 \times 10^{-4} \pm 8.71 \times 10^{-4}$ | 13                                        |           |            | -0.048 | 8.8         |
| AT4210_2_0-0.5   | Sediment |                     | May   |            | 9.7                       | -22.1                     | 0.22       | $5.34 \times 10^{-4} \pm 5.98 \times 10^{-4}$ | 12.2                                      | 0.9       | 2.7        | -0.011 | 23.1        |
| Pulse72_57_0-0.5 | Sediment |                     | Oc    |            | 8.8                       | -22.1                     | 0.24       | $3.82 \times 10^{-4} \pm 3.69 \times 10^{-4}$ | 11.2                                      | 0.8       | 3.0        | -1.068 | 36.1        |
| Pulse72_54_0-0.5 | Sediment |                     | Oc    |            | 8.5                       | -22.2                     | 0.24       | $9.62 \times 10^{-4} \pm 8.49 \times 10^{-4}$ | 10.1                                      | 1.4       | 3.4        | -0.81  | 29.7        |
| AT4210_71        | Hindgut  | <i>E. rostrata</i>  | May   |            | 11.3                      | -21.1                     | 0.46       | $8.10 \times 10^{-3}$                         | 18.5 (0.8)                                | 2 (0.3)   |            | -0.55  | 46.6        |
| AT4210_75        | Hindgut  | <i>E. rostrata</i>  | May   |            | 9.7                       | -22.0                     | 0.32       | $7.35 \times 10^{-3} \pm 4.72 \times 10^{-3}$ | 17.7                                      | 1.2       |            | -1.085 | 53          |
| Pulse72_8        | Foregut  | <i>E. rostrata</i>  | Oc    |            | 8.2                       | -21.2                     | 0.54       | $3.70 \times 10^{-2}$                         |                                           |           |            | -0.72  | 38.5        |
| Pulse72_12       | Foregut  | <i>E. rostrata</i>  | Oc    |            | 7.50                      | -21.5                     | 0.35       | $4.14 \times 10^{-2} \pm 6.68 \times 10^{-3}$ | 10.1                                      | 1.8       | 3.2        | -1.05  | 38.2        |
| Pulse72_10       | Hindgut  | <i>E. rostrata</i>  | Oc    |            | 7.10                      | -21.8                     | 0.37       | $1.80 \times 10^{-2} \pm 3.06 \times 10^{-3}$ | 11.7                                      | 1.9       | 2.9        | -0.99  | 40.4        |
| Pulse72_14       | Hindgut  | <i>E. rostrata</i>  | Oc    |            | 8.00                      | -21.6                     | 0.34       | $5.89 \times 10^{-2} \pm 3.26 \times 10^{-3}$ | 10.3 (2.2)                                | 2.1 (0.3) | 3.0        | -1.43  | 53.5        |
| AT4210_109       | Hindgut  | <i>S. globosa</i>   | May   |            | 9.6                       | -23.0                     | 0.29       | $4.18 \times 10^{-3}$                         | 13.9 (1.2)                                | 1 (0.2)   |            | 0.72   | 10.7        |
| AT4210_105       | Hindgut  | <i>S. globosa</i>   | May   |            | 10.6                      | -22.1                     | 0.34       | $2.15 \times 10^{-2}$                         | 11 (0.8)                                  | 2.3 (0.4) | 3.2        | 0.13   | 15.8        |
| AT4210_14        | Hindgut  | <i>O. mutabilis</i> | May   |            | 9.1                       | -23.6                     | 0.28       | $3.75 \times 10^{-2} \pm 2.34 \times 10^{-2}$ | 11.3 (1.4)                                | 1.9 (0.3) | 3.1        | 0.28   | 20          |
| AT4210_18        | Hindgut  | <i>O. mutabilis</i> | May   |            | 12.5                      | -21.9                     | 0.66       | $5.57 \times 10^{-2} \pm 4.00 \times 10^{-3}$ | 9.3 (0.9)                                 | 3.0 (0.5) | 4.9        | 0.38   | 20.9        |
| Pulse72_5        | Hindgut  | <i>O. mutabilis</i> | Oc    |            | 7.9                       | -21.8                     | 0.36       | $2.13 \times 10^{-2} \pm 2.65 \times 10^{-3}$ | 11.6 (0.6)                                | 2.1 (0.3) | 2.9        | 0.46   | 17.4        |
| Pulse72_46       | Hindgut  | <i>O. mutabilis</i> | Oc    |            | 8.2                       | -21.3                     | 0.55       | $2.82 \times 10^{-2}$                         | 10.3 (0.7)                                | 2.3 (0.4) | 2.7        | 0.39   | 16.3        |
| Pulse72_3        | Foregut  | <i>O. mutabilis</i> | Oc    |            | 11.8                      | -21.7                     | 0.91       | $6.55 \times 10^{-2} \pm 1.17 \times 10^{-3}$ | 11.5 (0.7)                                | 2.5 (0.4) | 2.7        | 0.28   | 18.8        |

|            |         |                     |     |       |      |       |      |                                               |            |           |     |       |      |
|------------|---------|---------------------|-----|-------|------|-------|------|-----------------------------------------------|------------|-----------|-----|-------|------|
| Pulse72_44 | Foregut | <i>O. mutabilis</i> | Oc  |       | 9.9  | -21.9 | 0.75 | $3.22 \times 10^{-2} \pm 7.01 \times 10^{-3}$ | 9.7 (0.7)  | 1.9 (0.3) | 2.7 | 0.011 | 19.6 |
| AT4210_68  | Body    | <i>E. rostrata</i>  | May | 145.6 | 16.1 | -20.8 | 1.67 | $0.38 \pm 0.11$                               | 15.4 (1.9) | 2.6 (0.5) | 3.1 | -1.27 | 54   |
| AT4210_72  | Body    | <i>E. rostrata</i>  | May | 138.1 | 15.1 | -18.7 | 2.13 | $0.32 \pm 0.1$                                | 15 (1)     | 3.0 (0.5) | 3.3 | -1.33 | 45.5 |
| Pulse72_7  | Body    | <i>E. rostrata</i>  | Oc  | 229.5 | 14.6 | -18.7 | 0.90 | $0.15 \pm 0.03$                               | 14.9 (0.9) | 3.1 (0.5) | 2.8 | -1.66 | 63.3 |
| Pulse72_11 | Body    | <i>E. rostrata</i>  | Oc  | 127.5 | 14.9 | -18.9 | 0.95 | $0.15 \pm 0.05$                               | 14.6 (1.1) | 3.0 (0.5) | 3.0 | -1.42 | 57.5 |
| AT4210_102 | Body    | <i>S. globosa</i>   | May | 39.0  | 13.5 | -18.7 | 3.43 | $1.36 \pm 0.24$                               | 9.9 (0.6)  | 2.5 (0.4) | 2.3 | -0.40 | 27.3 |
| AT4210_106 | Body    | <i>S. globosa</i>   | May | 37.5  | 13.5 | -18.2 | 3.47 | $0.92 \pm 0.29$                               | 9.7 (0.5)  | 2.6 (0.4) | 2.3 | -0.45 | 28.3 |
| AT4210_11  | Body    | <i>O. mutabilis</i> | May | 119.3 | 16.9 | -20.2 | 3.73 | $0.96 \pm 0.20$                               | 11.7 (0.8) | 3.3 (0.5) | 2.0 | -0.73 | 36.6 |
| AT4210_15  | Body    | <i>O. mutabilis</i> | May | 67.7  | 16.8 | -20.3 | 3.14 | $0.65 \pm 0.21$                               | 13.7 (0.4) | 3.3 (0.5) | 2.5 | -0.62 | 33.8 |
| Pulse72_2  | Body    | <i>O. mutabilis</i> | Oc  | 46.1  | 14.6 | -19.2 | 3.42 | $1.28 \pm 0.42$                               | 12.8 (1.1) | 2.5 (0.4) | 1.3 | -0.79 | 35.5 |
| Pulse72_43 | Body    | <i>O. mutabilis</i> | Oc  | 31.1  | 15.2 | -19.8 | 3.23 | $1.33 \pm 0.53$                               | 11.4 (1.3) | 3.1 (0.5) | 2.5 | -0.82 | 35.7 |

Table S2. Stable isotopic composition and elemental composition of sediment samples downcore.

| Month   | Depth (mm) | $\delta^{15}\text{N}$ (‰) | $\delta^{13}\text{C}$ (‰) | TOC (wt. %)     | TN (wt. %)      |
|---------|------------|---------------------------|---------------------------|-----------------|-----------------|
| May     | 0-5        | $9.7 \pm 0.0$             | $-22.1 \pm 0.1$           | $1.37 \pm 0.05$ | $0.22 \pm 0.01$ |
|         | 5-10       | $9.6 \pm 0.1$             | $-22.1 \pm 0.1$           | $1.42 \pm 0.05$ | $0.23 \pm 0.01$ |
|         | 10-20      | $9.6 \pm 0.1$             | $-22.1 \pm 0.0$           | $1.46 \pm 0.07$ | $0.24 \pm 0.01$ |
|         | 20-30      | $9.5 \pm 0.0$             | $-22.1 \pm 0.0$           | $1.51 \pm 0.08$ | $0.24 \pm 0.01$ |
|         | 30-40      | $9.4 \pm 0.1$             | $-22.1 \pm 0.0$           | $1.57 \pm 0.02$ | $0.25 \pm 0.00$ |
|         | 40-50      | $9.4 \pm 0.1$             | $-22.2 \pm 0.1$           | $1.55 \pm 0.06$ | $0.25 \pm 0.01$ |
| October | 50-100     | $9.5 \pm 0.1$             | $-22.2 \pm 0.2$           | $1.53 \pm 0.03$ | $0.24 \pm 0.00$ |
|         | 0-5        | $8.8 \pm 0.3$             | $-22.2 \pm 0.1$           | $1.55 \pm 0.10$ | $0.23 \pm 0.01$ |
|         | 5-10       | $8.6 \pm 0.3$             | $-22.2 \pm 0.1$           | $1.48 \pm 0.05$ | $0.19 \pm 0.00$ |
